# Supplementary material for: Coupling the ParFlow Integrated Hydrology Model within the NASA Land Information System: A case study over the Upper Colorado River Basin
Source: Copernicus journal article supplement (doi:10.5194/hess-2024-280), 2024-11-06
Supplement: Supplementary file 1 [file hess-2024-280-supplement.pdf]

# **Coupling the ParFlow Integrated Hydrology Model within the NASA Land Information System: A case study over the Upper Colorado River Basin**

<sup>1,4,7</sup>Peyman Abbaszadeh, <sup>3</sup>Fadji Zaoua Maina, <sup>1,4</sup>Chen Yang, <sup>5</sup>Dan Rosen, <sup>3</sup>Sujay Kumar,  
<sup>6</sup>Matthew Rodell, <sup>1,2,4</sup>Reed Maxwell

<sup>1</sup>*Department of Civil and Environmental Engineering, Princeton University, Princeton, NJ, USA*

<sup>2</sup>*High Meadows Environmental Institute, Princeton University, Princeton, NJ, USA*

<sup>3</sup>*Hydrological Sciences Laboratory, NASA Goddard Space Flight Center, Greenbelt, MD, USA*

<sup>4</sup>*Integrated GroundWater Modeling Center, Princeton University, Princeton, NJ USA*

<sup>5</sup>*Climate & Global Dynamics Lab, The National Center for Atmospheric Research, Boulder, Colorado, USA*

<sup>6</sup> *Earth Sciences Division, NASA Goddard Space Flight Center, Greenbelt, MD, USA*

now at <sup>7</sup>*Department of Civil and Environmental Engineering, Hydrologic Modeling and Assimilation Lab, Portland State University, Portland, OR*

*Corresponding author: Peyman Abbaszadeh, [pabbaszadeh@princeton.edu](mailto:pabbaszadeh@princeton.edu),  
[pabbaszadeh@pdx.edu](mailto:pabbaszadeh@pdx.edu)*

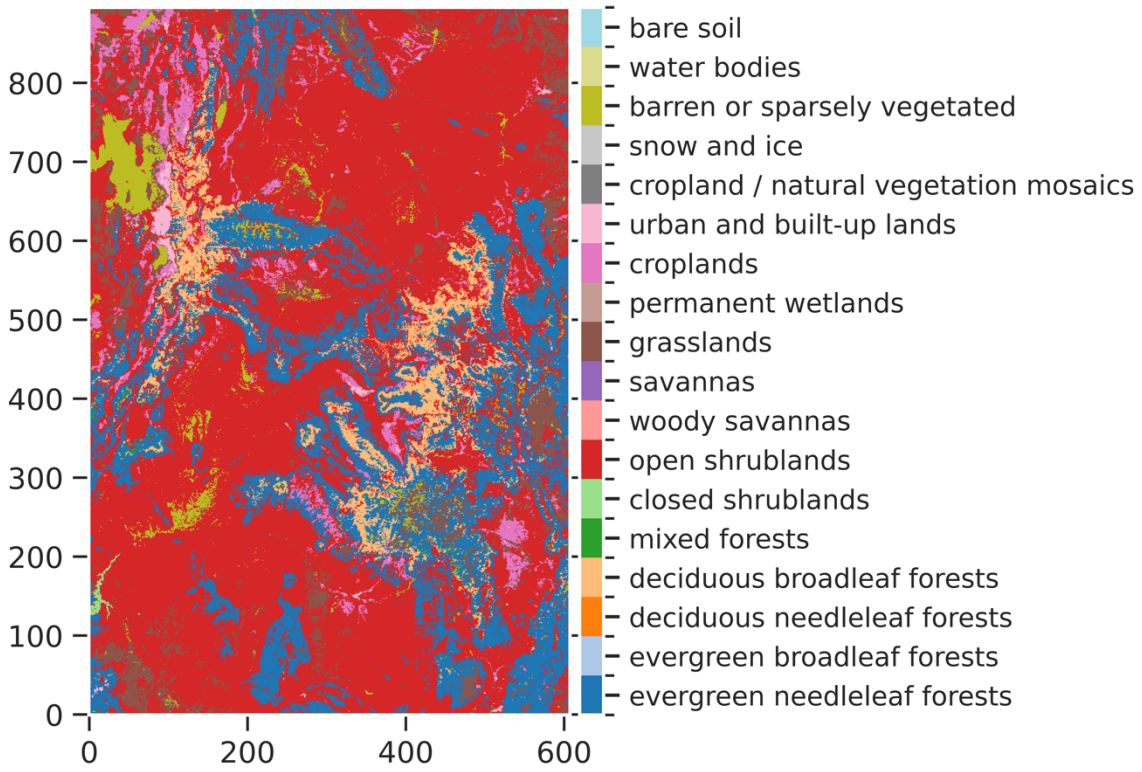

*Figure S1. Land use land cover classification over the UCRB domain.*

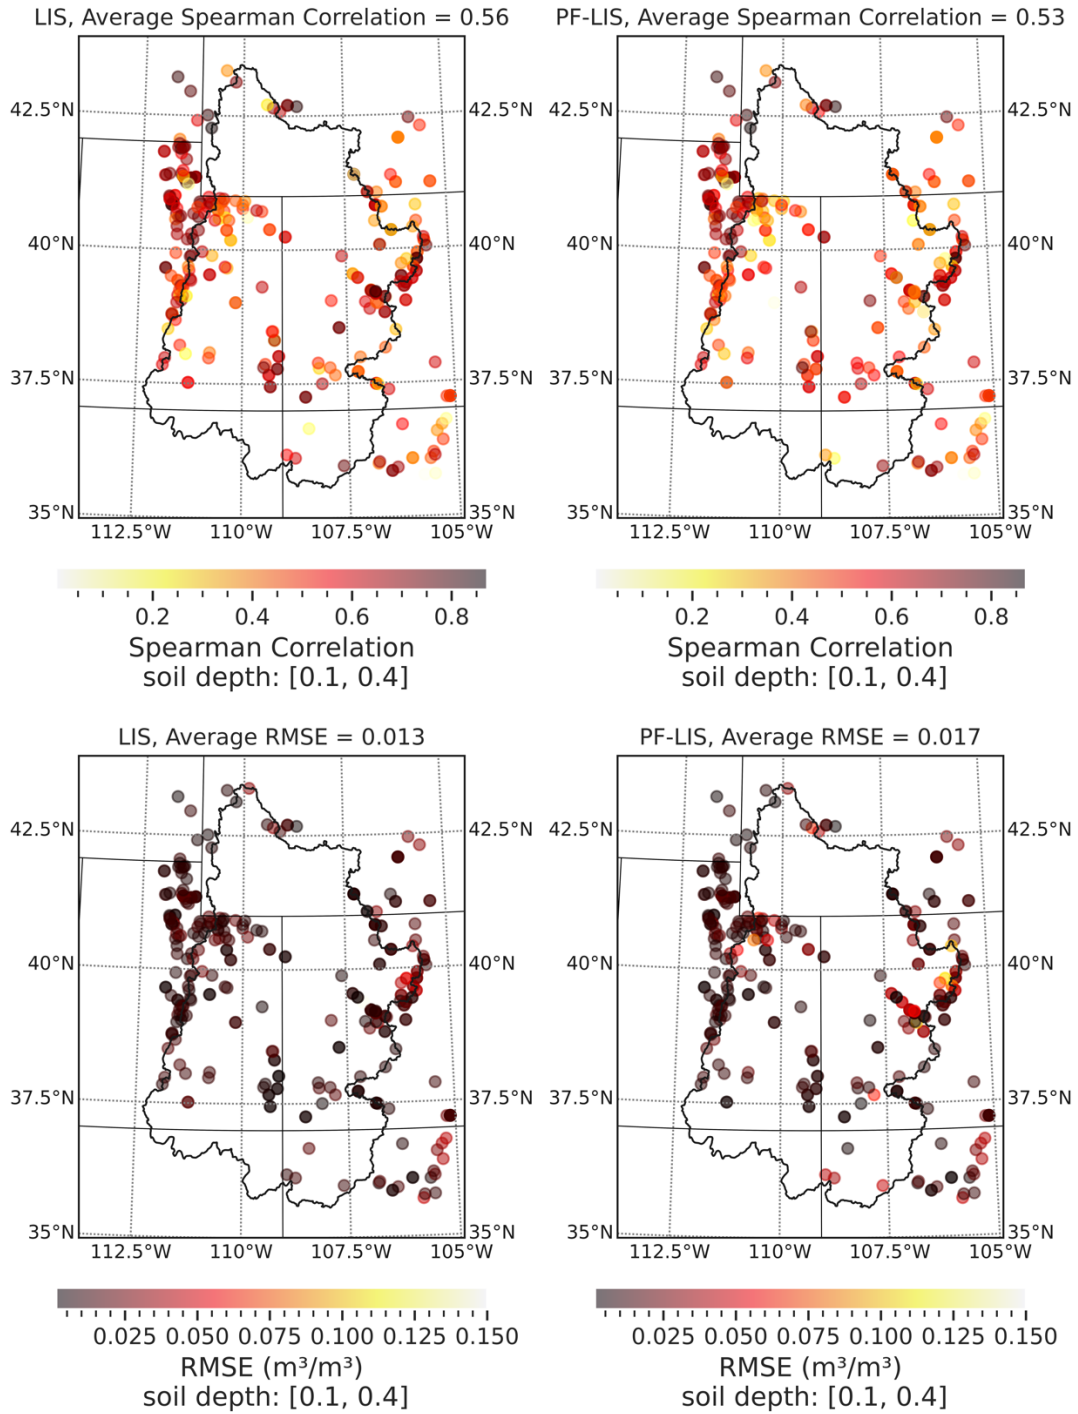

Figure S2. The Spearman's correlation coefficient and RMSE between the simulated and observed soil moisture at the soil depth of 0.1-0.4 m. This result is reported based on 20-year model simulation and observation data, from January 2002 to December 2022.

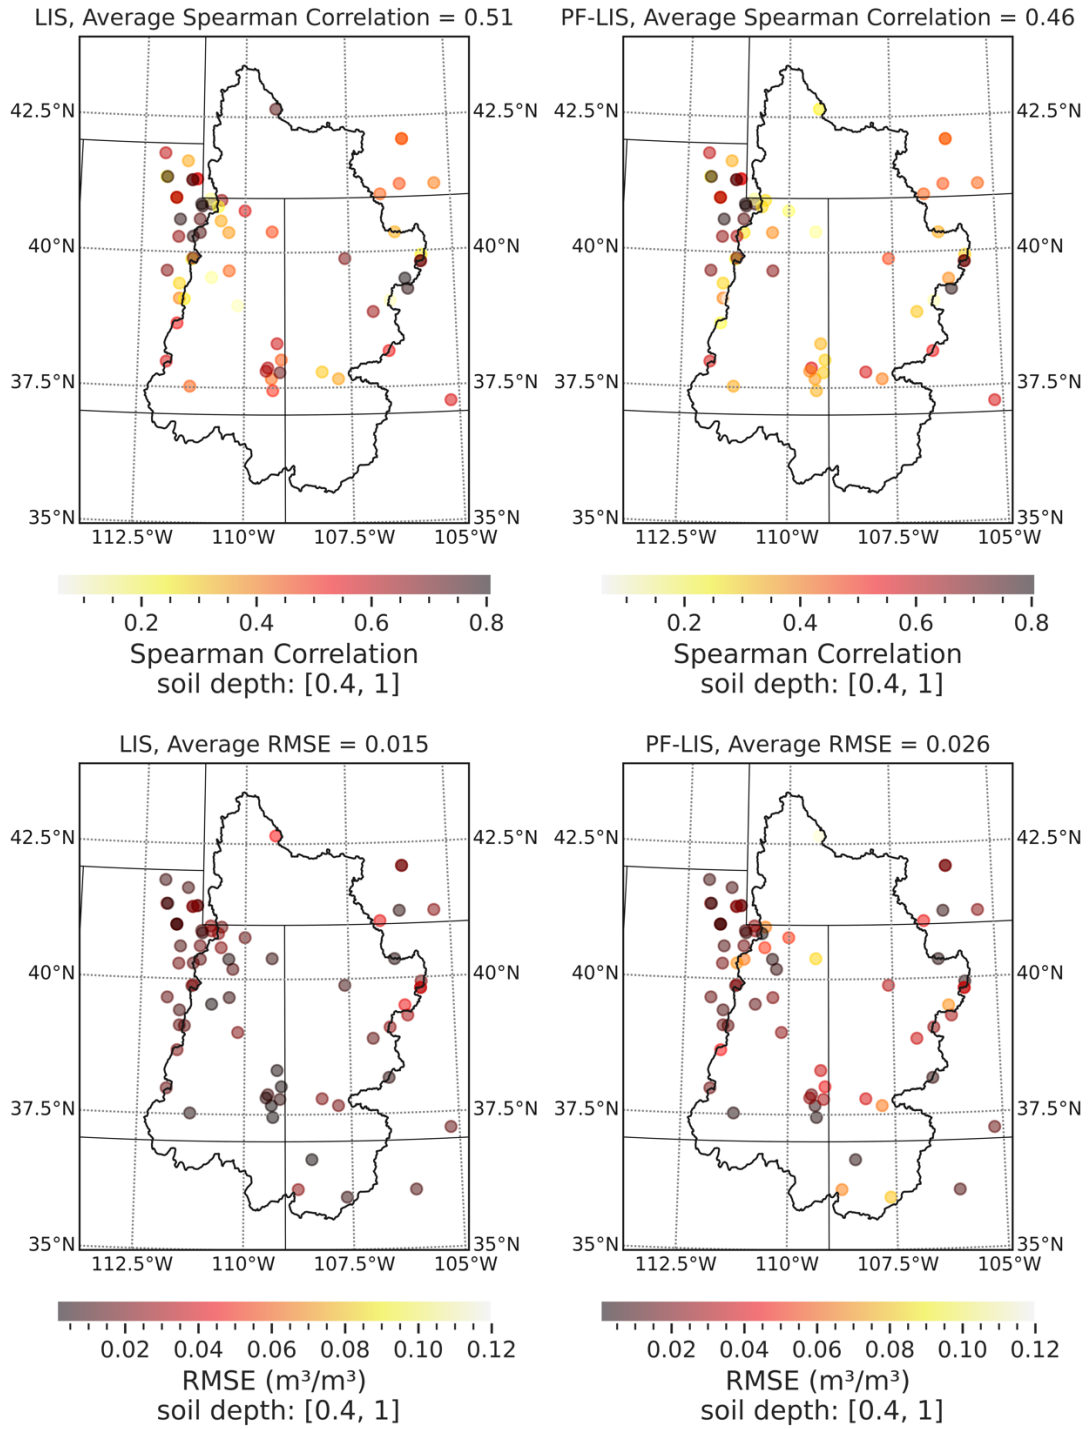

*Figure S3. The Spearman's correlation coefficient and RMSE between the simulated and observed soil moisture at the soil depth of 0.4-1 m. This result is reported based on 20-year model simulation and observation data, from January 2002 to December 2022.*

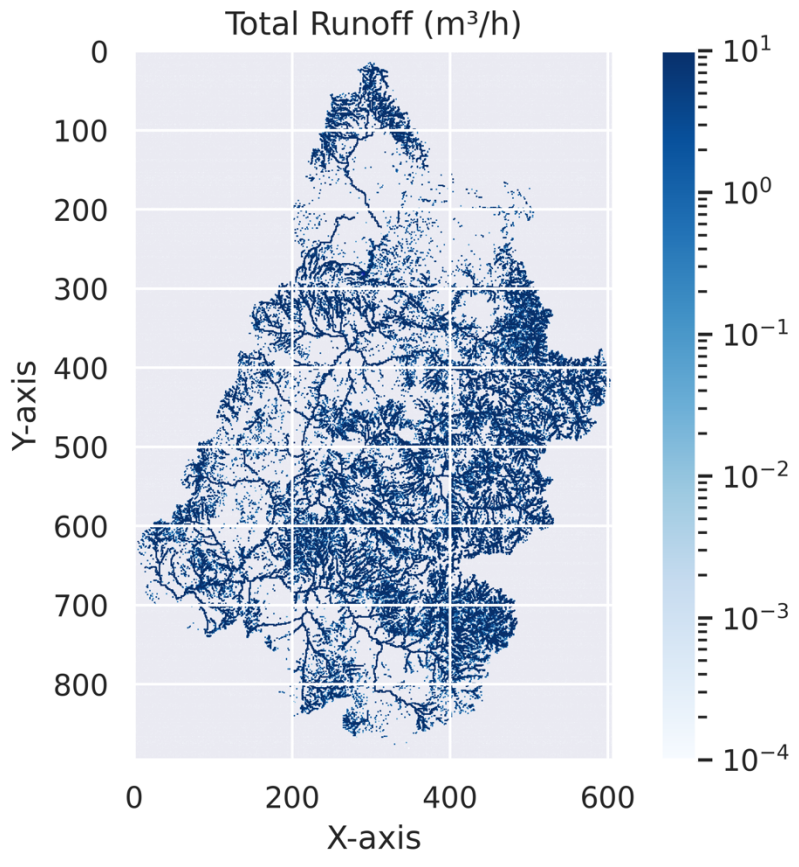

Figure S4. An example of total runoff data calculated over the UCRB.

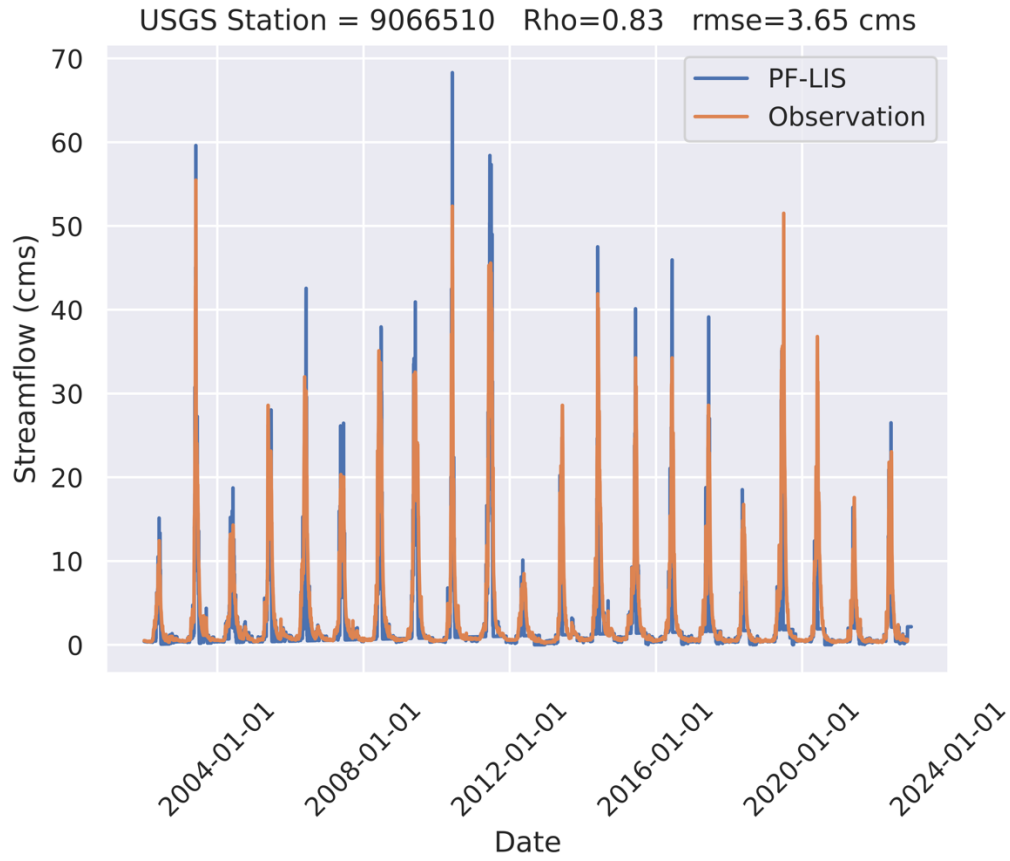

Figure S5. Streamflow simulation from PF-LIS model against streamflow observation from USGS 9066510 Gore Creek at Mouth Near Minturn, CO, over the period of 20 years.
